# Supplementary material
Source: PubMed Central journal article supplement (PMC6985728)

**Table S1.** Comparative analysis of MDR/XDR ST175 and ST235 high-risk clones

| Variable                                  | MDR/XDR ST175 clone<br>(n=43; 56.6%) | MDR/XDR ST235 clone<br>(n=33; 43.4%) | <i>p</i> |
|-------------------------------------------|--------------------------------------|--------------------------------------|----------|
| Age (years)                               | 59.0 (52.0-72.7)                     | 62.0 (50.5-71.3)                     | 0.699    |
| Male sex                                  | 24 (55.8)                            | 22 (66.7)                            | 0.469    |
| Comorbidity                               |                                      |                                      |          |
| Charlson comorbidity index                | 2 (2-4)                              | 2 (1-3)                              | 0.077    |
| Diabetes mellitus                         | 10 (23.3)                            | 14 (42.4)                            | 0.125    |
| End-stage renal disease                   | 6 (13.9)                             | 3 (9.0)                              | 0.723    |
| Solid malignancy                          | 10 (23.3)                            | 7 (21.2)                             | 0.832    |
| Hematological malignancy                  | 21 (48.8)                            | 8 (24.2)                             | 0.051    |
| Severe neutropenia                        | 18 (41.9)                            | 10 (30.3)                            | 0.426    |
| Transplant                                | 8 (18.6)                             | 5 (15.2)                             | 0.929    |
| ICU admission in previous 3 mo.           | 6 (13.9)                             | 8 (24.2)                             | 0.396    |
| Prior invasive procedures                 |                                      |                                      |          |
| Venous catheter                           | 34 (79.1)                            | 27 (81.8)                            | 0.993    |
| Urinary catheter                          | 18 (41.9)                            | 16 (48.5)                            | 0.731    |
| Mechanical ventilation                    | 6 (13.9)                             | 7 (21.2)                             | 0.599    |
| Surgery in previous mo.                   | 12 (27.9)                            | 15 (45.5)                            | 0.179    |
| Antimicrobial therapy in previous mo.     |                                      |                                      |          |
| Carbapenems                               | 12 (27.9)                            | 18 (54.5)                            | 0.034    |
| Fluoroquinolones                          | 19 (44.2)                            | 6 (18.2)                             | 0.031    |
| Acquisition type                          |                                      |                                      |          |
| Nosocomial                                | 37 (86.0)                            | 23 (69.7)                            | 0.147    |
| Healthcare-associated                     | 6 (13.9)                             | 10 (30.3)                            | 0.147    |
| Community                                 | 0 (0)                                | 0 (0)                                |          |
| Primary source of infection               |                                      |                                      |          |
| High-risk source                          | 29 (67.4)                            | 25 (75.8)                            | 0.591    |
| Unknown                                   | 5 (11.6)                             | 2 (6.0)                              | 0.692    |
| Respiratory                               | 15 (34.9)                            | 14 (42.4)                            | 0.665    |
| Abdominal                                 | 8 (18.6)                             | 6 (18.2)                             | 0.962    |
| Soft tissue                               | 1 (2.3)                              | 3 (7.8)                              | 0.310    |
| Low-risk source                           | 14 (32.6)                            | 8 (24.2)                             | 0.591    |
| Urinary                                   | 9 (20.9)                             | 6 (18.2)                             | 0.993    |
| Vascular catheter                         | 4 (9.3)                              | 2 (6.0)                              | 0.962    |
| Other                                     | 1 (2.3)                              | 0 (0)                                | ---      |
| Clinical presentation                     |                                      |                                      |          |
| Pitt bacteremia score $\geq 2$            | 24 (55.8)                            | 26 (78.8)                            | 0.064    |
| Septic shock                              | 10 (23.3)                            | 18 (54.5)                            | 0.010    |
| Inadequate empiric antibiotic             | 23 (53.5)                            | 22 (66.7)                            | 0.355    |
| TTSS genotype                             |                                      |                                      |          |
| <i>exoU+</i> / <i>exoS-</i>               | 0 (0)                                | 33 (100)                             | <0.001   |
| <i>exoU-</i> / <i>exoS+</i>               | 43 (100)                             | 0 (0)                                | <0.001   |
| <i>exoU-</i> / <i>exoS-</i>               | 0 (0)                                | 0 (0)                                | ---      |
| Carbapenemase type                        |                                      |                                      |          |
| VIM-2                                     | 43 (100)                             | 0 (0)                                | <0.001   |
| GES-5                                     | 0 (0)                                | 33 (100)                             | <0.001   |
| O-antigen serotype                        |                                      |                                      |          |
| O1                                        | 0 (0)                                | 4 (12.1)                             | ---      |
| O4                                        | 43 (100)                             | 0 (0)                                | <0.001   |
| O6                                        | 0 (0)                                | 0 (0)                                | ---      |
| O11                                       | 0 (0)                                | 29 (87.9)                            | <0.001   |
| Other O-types                             | 0 (0)                                | 0 (0)                                | ---      |
| TTP of blood culture (hours) <sup>a</sup> | 14.0 (10.3-17.0)                     | 19.0 (14.0-20.0)                     | 0.005    |
| Outcome                                   |                                      |                                      |          |
| 5-day mortality                           | 14 (32.6)                            | 15 (45.5)                            | 0.363    |
| 30-day mortality                          | 21 (48.8)                            | 23 (69.7)                            | 0.111    |

All the data are expressed as n (%) or median (IQR). MDR, multidrug-resistant; XDR, extensively drug-resistant; ICU, intensive care unit; ST, sequence type; TTSS, type III secretion system TTP, time to positivity. <sup>a</sup>Time from the start of incubation to the alert signal by the blood culture system.

**Table S2.** Baseline characteristics of patients with *P. aeruginosa* bloodstream infection according to *exoU* genotype

| Variable                                  | Total<br>(n= 243; 100%) | <i>exoU</i> <sup>+</sup><br>(n=50; 20.6%) | <i>exoU</i> <sup>-</sup><br>(n=193; 79.4%) | <i>p</i> |
|-------------------------------------------|-------------------------|-------------------------------------------|--------------------------------------------|----------|
| Age (years)                               | 66.0 (55.0-77.0)        | 64.0 (57.0-74.0)                          | 66.0 (55.0-77.0)                           | 0.731    |
| Male sex                                  | 161 (66.3)              | 35 (70.0)                                 | 126 (65.3)                                 | 0.645    |
| Comorbidity                               |                         |                                           |                                            |          |
| Charlson comorbidity index                | 2 (2-3)                 | 2 (1-4)                                   | 2 (2-3)                                    | 0.699    |
| Diabetes mellitus                         | 63 (25.9)               | 21 (42.0)                                 | 42 (21.8)                                  | 0.006    |
| End-stage renal disease                   | 41 (16.9)               | 8 (16.0)                                  | 33 (17.1)                                  | 0.853    |
| Solid malignancy                          | 50 (20.6)               | 10 (20.0)                                 | 40 (20.7)                                  | 0.910    |
| Hematological malignancy                  | 62 (25.5)               | 12 (24.0)                                 | 50 (25.9)                                  | 0.925    |
| Severe neutropenia                        | 58 (23.9)               | 13 (26.0)                                 | 45 (23.3)                                  | 0.833    |
| Transplant                                | 52 (21.4)               | 8 (16.0)                                  | 44 (22.8)                                  | 0.395    |
| ICU admission in previous 3 mo.           | 44 (18.1)               | 12 (24.0)                                 | 32 (16.6)                                  | 0.313    |
| Prior invasive procedures                 |                         |                                           |                                            |          |
| Venous catheter                           | 146 (60.1)              | 37 (74.0)                                 | 109 (56.5)                                 | 0.036    |
| Urinary catheter                          | 107 (44.0)              | 25 (50.0)                                 | 82 (42.5)                                  | 0.427    |
| Mechanical ventilation                    | 36 (14.8)               | 10 (20.0)                                 | 26 (13.5)                                  | 0.349    |
| Surgery in previous mo.                   | 81 (33.3)               | 21 (42.0)                                 | 60 (31.1)                                  | 0.197    |
| Antimicrobial therapy in previous mo.     |                         |                                           |                                            |          |
| Carbapenems                               | 54 (22.2)               | 20 (40.0)                                 | 34 (17.6)                                  | 0.001    |
| Fluoroquinolones                          | 52 (21.4)               | 8 (16.0)                                  | 44 (22.8)                                  | 0.395    |
| Acquisition type                          |                         |                                           |                                            |          |
| Nosocomial                                | 137 (56.4)              | 31 (62.0)                                 | 106 (54.9)                                 | 0.459    |
| Healthcare-associated                     | 82 (33.7)               | 18 (36.0)                                 | 64 (33.2)                                  | 0.833    |
| Community                                 | 24 (9.9)                | 1 (2.0)                                   | 23 (11.9)                                  | 0.034    |
| Primary source of infection               |                         |                                           |                                            |          |
| High-risk source                          | 150 (61.7)              | 36 (72.0)                                 | 114 (59.1)                                 | 0.130    |
| Unknown                                   | 26 (10.7)               | 5 (10.0)                                  | 21 (10.9)                                  | 1.000    |
| Respiratory                               | 55 (22.6)               | 18 (36.0)                                 | 37 (19.2)                                  | 0.019    |
| Abdominal                                 | 50 (20.6)               | 9 (18.0)                                  | 41 (21.2)                                  | 0.757    |
| Soft tissue                               | 19 (7.8)                | 4 (8.0)                                   | 15 (7.8)                                   | 1.000    |
| Low-risk source                           | 93 (38.3)               | 14 (28.0)                                 | 79 (40.9)                                  | 0.130    |
| Urinary                                   | 67 (27.6)               | 12 (24.0)                                 | 55 (28.5)                                  | 0.648    |
| Vascular catheter                         | 23 (9.5)                | 2 (4.0)                                   | 21 (10.9)                                  | 0.180    |
| Other                                     | 3 (1.2)                 | 0 (0)                                     | 3 (1.6)                                    | 1.000    |
| Clinical presentation                     |                         |                                           |                                            |          |
| Pitt bacteremia score ≥2                  | 135 (55.6)              | 37 (74.0)                                 | 98 (50.8)                                  | 0.005    |
| Septic shock                              | 66 (27.2)               | 26 (52.0)                                 | 40 (20.7)                                  | <0.001   |
| Resistance phenotype                      |                         |                                           |                                            |          |
| Non-MDR                                   | 150 (61.7)              | 17 (34.0)                                 | 133 (68.9)                                 | <0.001   |
| ModR                                      | 127 (52.3)              | 13 (26.0)                                 | 114 (59.1)                                 | <0.001   |
| MultiS                                    | 23 (9.5)                | 4 (8.0)                                   | 19 (9.8)                                   | 1.000    |
| MDR                                       | 93 (38.3)               | 33 (66.0)                                 | 60 (31.1)                                  | <0.001   |
| XDR                                       | 87 (35.8)               | 33 (66.0)                                 | 54 (27.9)                                  | <0.001   |
| Non-XDR                                   | 6 (2.5)                 | 0 (0)                                     | 6 (3.1)                                    | 0.351    |
| Carbapenemase/ST                          |                         |                                           |                                            |          |
| VIM-2/ST175                               | 43 (17.7)               | 0 (0)                                     | 43 (22.3)                                  | <0.001   |
| GES-5/ST235                               | 33 (13.6)               | 33 (66.0)                                 | 0 (0)                                      | <0.001   |
| O-antigen serotype                        |                         |                                           |                                            |          |
| O1                                        | 38 (15.6)               | 7 (14.0)                                  | 31 (16.1)                                  | 0.889    |
| O4                                        | 50 (20.6)               | 0 (0)                                     | 50 (25.9)                                  | <0.001   |
| O6                                        | 38 (15.6)               | 2 (4.0)                                   | 36 (18.7)                                  | 0.009    |
| O11                                       | 37 (15.2)               | 33 (66.0)                                 | 4 (2.1)                                    | <0.001   |
| Other O-types                             | 80 (32.9)               | 8 (16.0)                                  | 72 (37.3)                                  | 0.007    |
| TTP of blood culture (hours) <sup>a</sup> | 16.0 (12.0-19.0)        | 17.0 (14.0-19.0)                          | 15.0 (12.0-18.0)                           | 0.077    |
| Outcome                                   |                         |                                           |                                            |          |
| 5-day mortality                           | 49 (20.2)               | 20 (40.0)                                 | 29 (15.0)                                  | <0.001   |
| 30- day mortality                         | 81 (33.3)               | 30 (60.0)                                 | 51 (26.4)                                  | <0.001   |

All the data are expressed as n (%) or median (IQR). MDR, multidrug-resistant; XDR, extensively drug-resistant; ICU, intensive care unit; ST, sequence type; TTP, time to positivity. <sup>a</sup>Time from the start of incubation to the alert signal by the blood culture system.

**Figure S1.** Kaplan-Meier curves showing the crude impact of MDR versus non-MDR phenotype (A and D), *exoU*<sup>+</sup> versus *exoU*<sup>-</sup> genotype (B and E), and O11 versus no-O11 serotype (C and F) on 5-day (A to C) and 30-day (D to E) mortality of patients with *P. aeruginosa* BSI. Statistical significance was determined by the log-rank test.

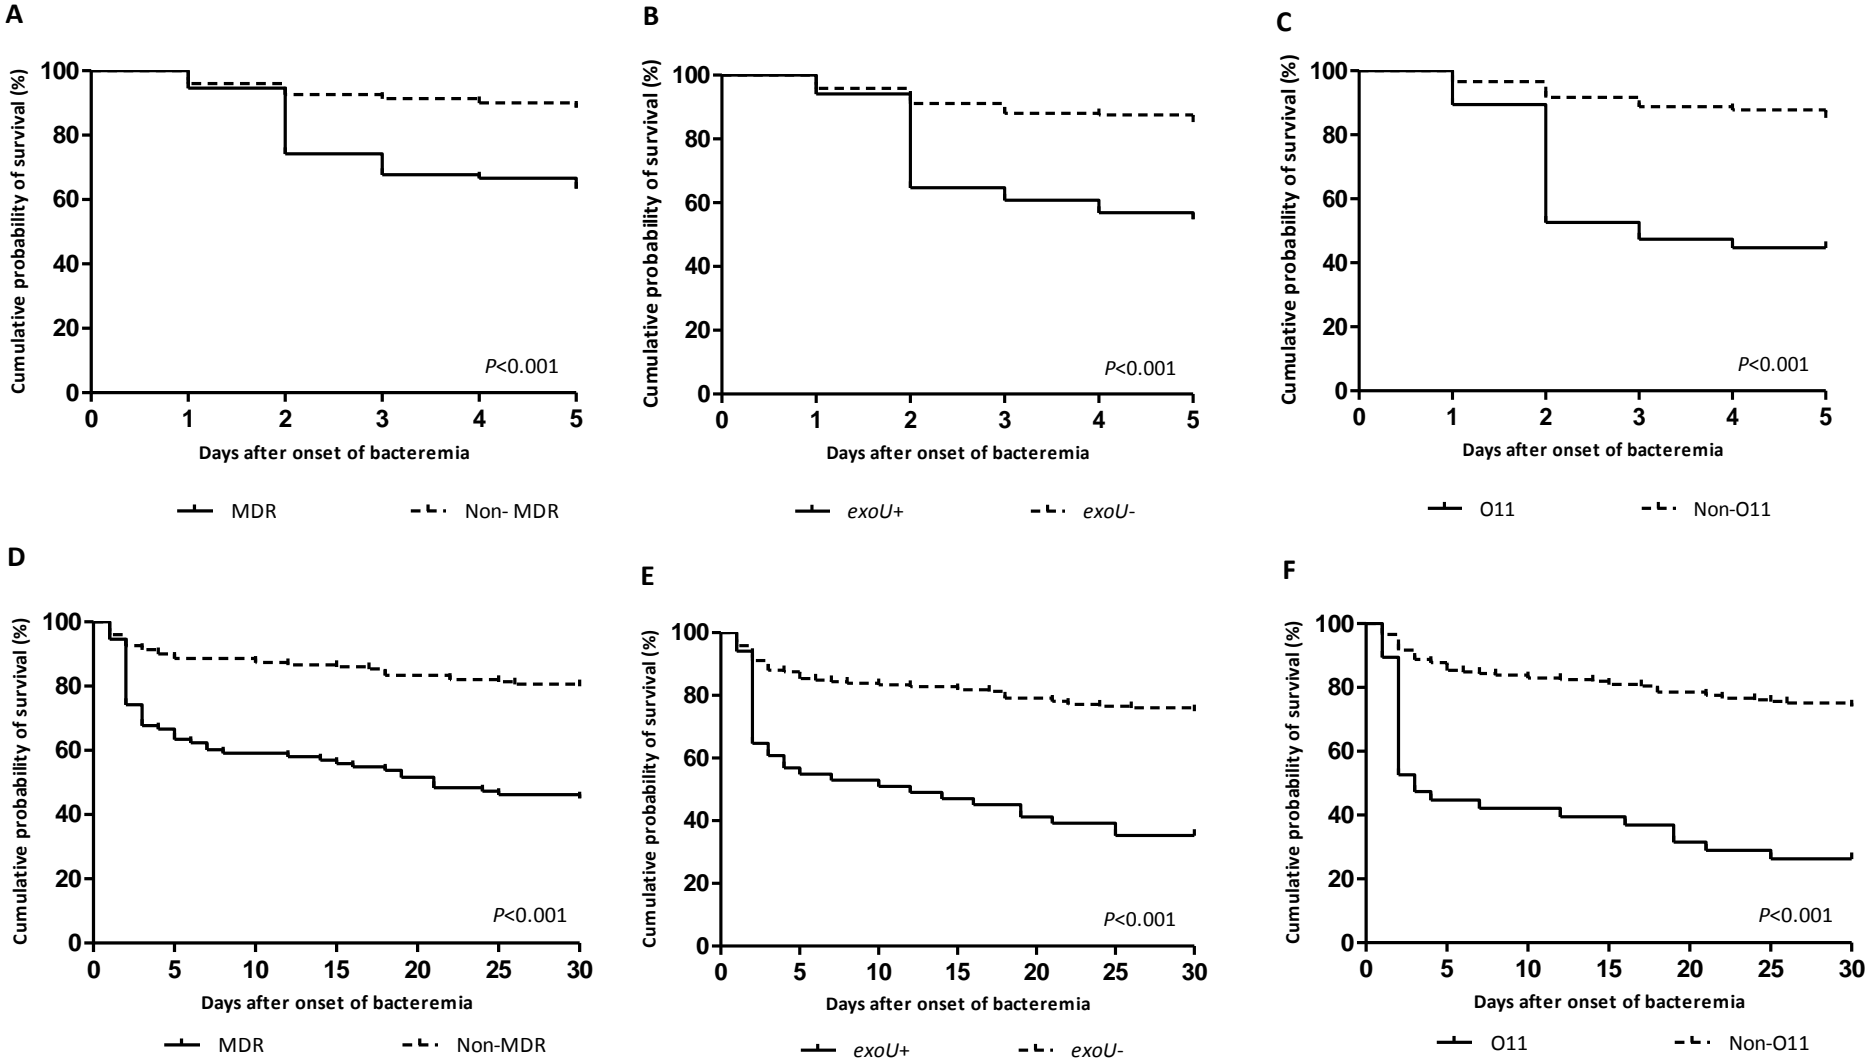

**Figure S2.** Relationship between mortality and time to positivity of blood culture. Significant association was assessed by the Mantle-Haenszel test for linear trends for 5-day mortality (black bars,  $p=0.006$ ) and 30-day mortality (grey bars,  $p=0.010$ ).

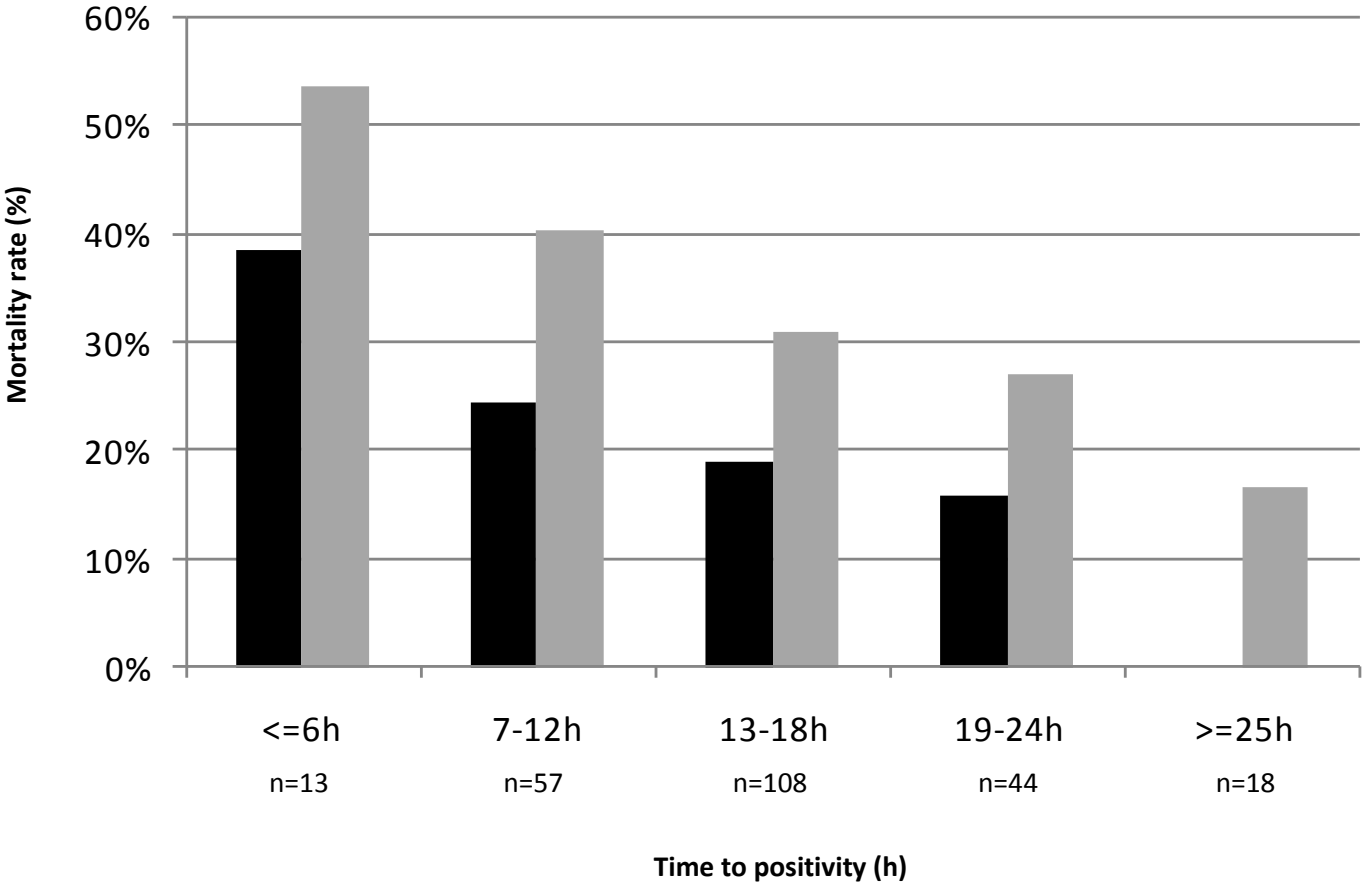

Supplement: AAC.01759-19-s0001.pdf [file AAC.01759-19-s0001.pdf]
